# Supplementary material for: The Impact of Different DNA Extraction Kits and Laboratories upon the Assessment of Human Gut Microbiota Composition by 16S rRNA Gene Sequencing
Source: PLoS One. 2014 Feb 24;9(2):e88982. doi: 10.1371/journal.pone.0088982 (PMC3933346; doi:10.1371/journal.pone.0088982)
Supplement: Table S1 — Barcodes used for each sample included in the study, and the respective ENA-deposited dataset that they can be recovered from. (XLSX) [file pone.0088982.s001.xlsx]

## Sheet: SampleBarcodes
Table S1 - Barcodes used for each sample included in the study, and the respective ENA-deposited dataset that they can be recovered from.
Note that some samples had low sequence counts in the first run and so were re-sequenced. Data from the second sequencing run are found in the smaller second portion of the table below.
Sample Name	Barcode	ENA Study Accession Number	ENA Sample Accession Number
I1F1II	AACGCACGCTAG	ERP004371	ERS373486
I1F2II	AACTCGTCGATG	ERP004371	ERS373486
I2F1II	AACTGTGCGTAC	ERP004371	ERS373486
I2F2II	AAGAGATGTCGA	ERP004371	ERS373486
I1MoII	AAGCTGCAGTCG	ERP004371	ERS373486
I2MoII	AATCAGTCTCGT	ERP004371	ERS373486
H3F1II	AATCGTGACTCG	ERP004371	ERS373486
H3F2II	ACACACTATGGC	ERP004371	ERS373486
H4F1II	ACACATGTCTAC	ERP004371	ERS373486
H4F2II	ACACGAGCCACA	ERP004371	ERS373486
H3MoII	ACACGGTGTCTA	ERP004371	ERS373486
H4MoII	ACACTAGATCCG	ERP004371	ERS373486
I1F1RI	ACACTGTTCATG	ERP004371	ERS373486
I1F2RI	ACAGACCACTCA	ERP004371	ERS373486
I2F1RI	ACAGAGTCGGCT	ERP004371	ERS373486
I2F2RI	ACAGCAGTGGTC	ERP004371	ERS373486
I1MoRI	ACAGCTAGCTTG	ERP004371	ERS373486
I2MoRI	ACAGTGCTTCAT	ERP004371	ERS373486
H3F1RI	ACAGTTGCGCGA	ERP004371	ERS373486
H3F2RI	ACATCACTTAGC	ERP004371	ERS373486
H4F1RI	ACATGATCGTTC	ERP004371	ERS373486
H4F2RI	ACATGTCACGTG	ERP004371	ERS373486
H3MoRI	ACATTCAGCGCA	ERP004371	ERS373486
H4MoRI	ACCACATACATC	ERP004371	ERS373486
I1F1IR	AGATGTTCTGCT	ERP004371	ERS373486
I1F2IR	AGCACACCTACA	ERP004371	ERS373486
I2F1IR	AGCACGAGCCTA	ERP004371	ERS373486
I2F2IR	AGCAGCACTTGT	ERP004371	ERS373486
H3F1IR	AGCAGTCGCGAT	ERP004371	ERS373486
H3F2IR	AGCATATGAGAG	ERP004371	ERS373486
H4F1IR	AGCCATACTGAC	ERP004371	ERS373486
H4F2IR	AGCGACTGTGCA	ERP004371	ERS373486
I1MoIR	AGCGAGCTATCT	ERP004371	ERS373486
I2MoIR	AGCGCTGATGTG	ERP004371	ERS373486
H3MoIR	AGCGTAGGTCGT	ERP004371	ERS373486
H4MoIR	AGCTATCCACGA	ERP004371	ERS373486
I1F1RR	AGCTCCATACAG	ERP004371	ERS373486
I1F2RR	AGCTCTCAGAGG	ERP004371	ERS373486
I2F1RR	AGCTGACTAGTC	ERP004371	ERS373486
I2F2RR	AGCTTGACAGCT	ERP004371	ERS373486
H3F1RR	AGGACGCACTGT	ERP004371	ERS373486
H3F2RR	AGGCTACACGAC	ERP004371	ERS373486
H4F1RR	AGGTGTGATCGC	ERP004371	ERS373486
H4F2RR	AGTACGCTCGAG	ERP004371	ERS373486
I1MoRR	AGTACTGCAGGC	ERP004371	ERS373486
I2MoRR	AGTAGTATCCTC	ERP004371	ERS373486
H3MoRR	AGTCACATCACT	ERP004371	ERS373486
H4MoRR	AGTCCATAGCTG	ERP004371	ERS373486
I1F2IR	AGCACACCTACA	ERP004372	ERS373498
H4F2IR	AGCGACTGTGCA	ERP004372	ERS373498
I1F2RR	AGCTCTCAGAGG	ERP004372	ERS373498
H3F1RR	AGGACGCACTGT	ERP004372	ERS373498
H3F2RR	AGGCTACACGAC	ERP004372	ERS373498
I1F2II	AACTCGTCGATG	ERP004372	ERS373498
H4F2II	ACACGAGCCACA	ERP004372	ERS373498
I1F2RI	ACAGACCACTCA	ERP004372	ERS373498
H3F1RI	ACAGTTGCGCGA	ERP004372	ERS373498
H3F2RI	ACATCACTTAGC	ERP004372	ERS373498
